# Supplementary material
Source: PubMed Central journal article supplement (PMC4947889)
Supplement: rspb20160717supp1.pdf [file rspb20160717supp1.pdf]

1 **Supporting Material for:**

2  
3 **Acoustic telemetry and network analysis reveal space-use of multiple reef predators and**  
4 **enhance MPA design**

5  
6 by

7  
8 James S. E. Lea, Nicolas E. Humphries, Rainer G. von Brandis, Christopher R. Clarke, David  
9 W. Sims

10  
11 **Supplementary Methods**

12  
13 *Study site*

14  
15 D'Arros Island (S 05°24', E 53°17') is a small sand cay (~1.6 km<sup>2</sup>) situated on a patch reef  
16 (~3.6 km<sup>2</sup>) in the Amirantes chain of islands of the Republic of Seychelles, western Indian  
17 Ocean (Fig. S1). Just over one kilometre east of D'Arros, separated by a channel of 60–70 m  
18 depth, is St Joseph Atoll (~22 km<sup>2</sup>; S 05°25', E 53°20'). St Joseph Atoll has 16 small islands  
19 atop an uninterrupted reef flat that encloses a shallow (3–9 m), access-restricted lagoon of ~5  
20 km<sup>2</sup>. The flats surrounding St Joseph lagoon are largely exposed at low tide, causing  
21 temporary isolation of the lagoon from the outer reef. Up to 2 m of water covers the flats at  
22 high tide. The lagoon is predominantly sand bottomed with numerous large coral outcrops  
23 that rise to the surface, with patches of seagrass *Thalassodendron sp.* along the flats and some  
24 mangroves *Rhizophora mucronata* fringing the islands [1]. The reefs surrounding D'Arros  
25 and St Joseph have reasonable coral cover and slope steeply from near the surface to 20–25 m  
26 depth. These reefs give way to the Amirantes plateau, which varies between 15–60 m depth  
27 and stretches 155 km from north to south. The plateau is predominantly covered by patches  
28 of seagrass and sandy reef rubble, with occasional patches of high coral cover. The plateau is  
29 surrounded by very deep water, with the edges descending from 30–60 m to over 1,000 m  
30 deep within a few hundred metres.

31  
32 *Animal telemetry*

33  
34 Between August 2012 and March 2015 a total of 116 sharks of five different species (blacktip  
35 reef *Carcharhinus melanopterus*, sicklefin lemon *Negaprion acutidens*, grey reef  
36 *Carcharhinus amblyrhynchos*, tawny nurse *Nebrius ferrugineus*, silvertip shark *Carcharhinus*  
37 *albimarginatus*) and 25 hawksbill turtles *Eretmochelys imbricata* were tagged with acoustic  
38 transmitters (either V13 180 s nominal delay or V16 120 s nominal delay, Vemco Ltd,  
39 Bedford, Canada). Sharks were caught either on research longlines, hand lines, or by hand  
40 whilst using SCUBA, and an acoustic transmitter was surgically implanted into each  
41 individual shark's abdominal cavity while it was in tonic immobility alongside the research  
42 vessel. The small incision was closed with three sutures (Ethibond Excel 4 x 75 cm non-  
43 absorbable coated, Ethicon Inc., Somerville, USA). Measurements were taken for each shark  
44 (precaudal length, fork length, total length), sex recorded, tissue sample for genetic analysis,  
45 and a number ID with contact details was attached for recapture purposes. Turtles were hand-  
46 captured using standard methods [2], and had the acoustic transmitter attached using a cable  
47 tie and epoxy resin to the 2<sup>nd</sup> rear marginal scute (right). Sharks and turtles were tracked  
48 using an array of 88 acoustic receivers (VR2W, Vemco Ltd) (Fig. S1). All field work was  
49 approved by, and conducted with the knowledge of, the Ministry of Environment, Energy,

50 and Climate Change, Seychelles. The animal handling and tagging methods were performed  
51 in accordance with the approved guidelines of the University of Plymouth, UK.

52

53 The array was installed in stages for logistical reasons. Initially 50 receivers were installed  
54 around D'Arros and St Joseph between August and November 2012, 25 in the immediate  
55 vicinity of the islands covering lagoon and coastal reef habitats, and another 25 spread across  
56 the surrounding plateau up to 15 km away, covering plateau and drop-off habitats. In October  
57 2013 a further 10 receivers were added so there was at least one at each of the other islands  
58 across the whole Amirantes plateau. In November 2013, 10 more receivers were installed  
59 along the reef flats of D'Arros and St Joseph to monitor their use during the high tide and in  
60 August 2014 a further 18 receivers. Given the staggered deployment of the array over time,  
61 only a subset of the detection records were used for analysis in the present study to avoid  
62 biases caused by the developing array design. Firstly, only receivers that had been deployed  
63 for over two years were included in this study, reducing the working array for analysis to all  
64 receivers installed up until November 2013 ( $n = 70$  in total; 35 coastal to D'Arros and St  
65 Joseph and 35 across the plateau). Three of these receivers experienced failure causing gaps  
66 in their detections records and were omitted from subsequent analysis. Secondly, track data  
67 before November 2013 were discarded so that we only considered track data when all 67  
68 receivers were active, reducing the effective sample size to 110 animals (86 sharks and 24  
69 turtles).

70

71 All downloaded detections were imported into a Microsoft Access (Microsoft Corporation,  
72 Redmond, USA) database, which assigned transmitter detections (pings) to the appropriate  
73 sharks and receiver locations, and filtered out any pings that did not match an active tag or  
74 receiver (i.e. false positives). Receiver clock-drift time corrections were also made during the  
75 import process, being calculated from the difference between the receiver and PC clock at the  
76 time of download, assuming linear drift. Tags were detected within ~150 m of the receiver, as  
77 determined by range testing: mean range 165 m  $\pm$  33 (SD).

78

### 79 *Network analysis*

80

81 Network analysis was used to determine both where sharks and turtles spent more time and  
82 how they moved through the array [3]. Each receiver location was treated as a node within  
83 the network, with node strength weighted according to the number of detections at that  
84 location. Any pair of subsequent pings that occurred between different nodes was treated as a  
85 connection between those nodes, with connection strength weighted by the number of times  
86 that specific pairing occurred. In this way matrices were constructed that detailed the  
87 connections between receivers and the detections at each receiver, allowing networks to be  
88 constructed and graphed to visualise movements and occupancy throughout the array for each  
89 species.

90

91 Due to the different ping frequencies of the V13 and V16 tags (180 s vs. 120 s nominal  
92 delays), the node and connection strengths of V13 networks were increased by 50% to  
93 account for the decreased probability of detection compared to the V16 networks. All network  
94 maps were produced using ArcGIS (ESRI Inc., CA, USA), with bathymetry data obtained  
95 from the U.S. Department of Commerce, National Oceanic and Atmospheric Administration  
96 (NOAA): 2-minute Gridded Global Relief Data (ETOPO2v2). The satellite image of D'Arros  
97 and St Joseph was acquired from LAND INFO Worldwide Mapping, LLC, and includes  
98 material Copyright © DigitalGlobe (Longmont, Colorado).

99

100 Several network metrics were used to describe each network: occupancy (or node strength)  
101 was computed from the number of detections occurring at each node and provided a measure  
102 of how much time individuals spent at each receiver location. Connectivity (or node  
103 centrality) is calculated from the total number of connections made to that node, i.e. the  
104 proportion of other nodes to which there is a connection. Transit (or node betweenness)  
105 represents the total number of paths to pass through that node and is computed by counting  
106 pings occurring at a receiver where the prior and subsequent pings for that individual occur at  
107 a different receiver. Transit therefore measures the extent to which a node is part of a corridor  
108 of movement as opposed to an area of occupancy. Node density is the proportion of total  
109 available nodes actually used in the network, measuring the extent of the array occupied, and  
110 edge density is the proportion of total available connections actually formed within the  
111 network, providing a measure of mobility within the network.

112  
113 To test whether the observed movement networks were different from random, random  
114 networks were generated and their node metrics were tested against those of the real tracks  
115 using Wilcoxon matched-pairs signed rank tests (SigmaPlot, Systat Software, San Jose, CA).  
116 For node and edge density, the values produced by the random networks were tested against  
117 the real network values as the population mean in one-sample signed rank tests. Random  
118 networks were constructed as follows: for a given set of detections (i.e. for a single animal),  
119 the node and connection matrix was first constructed as normal to provide the observed data.  
120 For each randomisation, the first ping at the first receiver was kept, and then a swim distance  
121 was calculated based on the time between detections and a 1 m s<sup>-1</sup> swim speed. Receivers  
122 were then selected at random until two were found within range of the swim distance. The  
123 closer of the two was then selected as the next receiver in the random track. If no receiver  
124 was found in range after 100 random selections then no move was deemed to occur and the  
125 current receiver was assigned (i.e. the animal was deemed not to have moved). This was  
126 repeated for the duration of the track, producing a random walk through the array with steps  
127 constrained by the observed detection intervals. This was repeated 100 times for each track,  
128 to provide mean random network metrics to test against the observed real track metrics.

129  
130 Each receiver location was designated a habitat type: lagoon (habitat within St Joseph Atoll,  
131 including the flats), coastal reef (sloped reefs bordering islands), plateau (flat-bottomed areas  
132 of patchy reef rubble and seagrass beds) or drop-off (the edge of the plateau, before it drops  
133 to hundreds of metres). To reveal differences in space use between habitats for each species,  
134 node metrics were grouped according to habitat type and had their values compared to those  
135 of the same habitat type in the random networks. This was achieved by calculating a  
136 randomisation index:

$$Rnd_i = \frac{O_m - R_m}{R_m} \times 100$$

137 Where  $O_m$  is the observed and  $R_m$  the random metric. Mean values were then plotted for each  
138 node metric in each habitat type, according to species. For each individual a residency index  
139 was calculated, representing the percentage of days during its track that it was detected within  
140 the array:

$$Res_i = \frac{D_d}{D_{al}} \times 100$$

141 Where  $D_d$  is days detected and  $D_{al}$  is days at liberty.

142

143 *Grid occupancy analysis*

144

145 The data were further used to evaluate the potential efficacy of two MPA designs. Each  
146 design had its boundary radius restricted to 1 km as this matches the current best in  
147 Seychelles for the UNESCO World Heritage Site of Aldabra Atoll [4]. The first MPA model,  
148 the null MPA, matches the Aldabra designation, with the boundary being formed by 1 km  
149 from the beach at MHW. The second proposed MPA keeps the same boundary radius of 1  
150 km, but instead measures it from the edge of the reef flat at the lowest astronomical tide. Due  
151 to the extensive reef flats at D'Arros and St Joseph, that are exposed at low tide and can  
152 exceed 1 km width, this forces the boundary to include all of the lagoon and coastal reefs,  
153 some of which remain exposed in the null MPA. The smaller null MPA encompassed an area  
154 of approximately 42.3 km<sup>2</sup>, while the larger proposed MPA covers approximately 64.9 km<sup>2</sup>  
155 (~50% increase in area).

156  
157 The potential efficacy of both MPAs was determined using a grid occupancy analysis. In  
158 order to account for bias that may stem from the uneven distribution of acoustic receivers,  
159 each track was interpolated across all gaps shorter than 24 hrs (longer gaps were ignored to  
160 limit erroneous interpolation). The array was then divided into 0.5 km grid squares, and the  
161 number of days each individual occurred within each grid square was summed. Using the  
162 boundaries of the null and proposed MPAs, it was then possible to sum the number of days  
163 each individual would have spent within the boundaries of each, based on which grid cells  
164 were in which MPA. The number of days inside/outside was then used to calculate the  
165 proportion of each individual's recorded array occupancy that was inside each MPA.  
166 Proportion of time inside each MPA was then plotted using box plots, to see how much time  
167 each species spent within each MPA. The significance of differences in time spent inside  
168 each MPA was tested for each species using Wilcoxon matched-pairs signed rank tests, with  
169 Monte Carlo p values calculated after 10,000 permutations (IBM SPSS Statistics, IBM Corp.  
170 USA).

171

## 172 **Supplementary Results**

173

174 Over the course of the study (August 2012 to November 2015) 141 acoustic transmitters were  
175 deployed on five different shark species and one turtle species, providing a total of 75,911  
176 tracking days. However, to accommodate the staggered deployment of acoustic receivers (see  
177 Methods for details), the study period was restricted to November 2013 to November 2015  
178 and the effective sample to 110 tagged individuals: blacktip reef ( $n = 25$ ), grey reef ( $n = 22$ ),  
179 sicklefin lemon ( $n = 20$ ), tawny nurse ( $n = 6$ ), silvertip sharks ( $n = 13$ ), and hawksbill turtle ( $n$   
180  $= 24$ ), providing over 50,477 tracking days (Table 1). A range of juveniles and adults was  
181 tagged for each species, apart from silvertip sharks and hawksbill turtles, all of which were  
182 juvenile. Mean track duration across all sharks ( $n = 86$ ) was 484 days  $\pm$  265 (SD), with 64.0%  
183 of tracks lasting more than a year. Mean turtle track ( $n = 24$ ) duration was 368 days  $\pm$  210  
184 (SD), with 62.5% of tracks lasting more than a year. All shark species showed a bias towards  
185 females amongst tagged individuals, with grey reef sharks displaying the largest disparity of  
186 six females for every male tagged. As all turtles were juvenile, sex determination was not  
187 undertaken as it was not relevant to the study's objective and can only be achieved through  
188 costly and potentially invasive procedures (laparoscopy and blood sampling).

189

### 190 *Species-specific habitat use*

191

192 All metrics of the real networks of all species were statistically different from those generated  
193 by the random networks (Tables S1 and S2). Blacktip reef sharks displayed very restricted  
194 movements, with 99.8% of all detections occurring within the confines of St Joseph Atoll

195 (Fig. 2), residency that is reflected by their moderate node density (0.52). Blacktip reef sharks  
196 displayed very high occupancy of lagoon habitats compared to random networks (Fig. 3).  
197 Even within the atoll, blacktip reef shark movements were largely focused on the eastern end  
198 of the lagoon, consistent with their very low edge density of 0.09, compared to the mean  
199 random network edge density of 0.72. There was very limited movement between D'Arros  
200 and St Joseph across the deep channel, with little time spent on the coastal reefs. When  
201 around D'Arros, blacktip reef sharks appeared to spend the majority of their time on the more  
202 expansive reef flat to the west. Some blacktip reef sharks were only detected infrequently by  
203 the subset of receivers used in this study. However, evidence from newer receivers not  
204 included in the present analysis (see Methods) reveals that these individuals spent the  
205 majority of their time in pools along the atoll flats. These individuals were therefore within  
206 lagoon habitat but outside the range of this study's acoustic monitoring array (Fig. S1).

207

208 Broadly, the sicklefin lemon sharks showed a similar pattern to the blacktip reef sharks, with  
209 98.8% of all detections occurring within the atoll (Fig. 2). Moreover, comparison of node  
210 metrics by habitat type revealed elevated occupancy of atoll habitats in real networks  
211 compared to random networks, with other habitats being used less frequently (Fig. S2).  
212 However, the sicklefin lemon shark network shows greater movement throughout the atoll,  
213 particularly around the deep lagoon perimeter where it borders the flats. Lemon shark  
214 movements also connect more frequently to the coastal reefs outside the atoll and, most  
215 notably, several individuals were recorded making wider movements across the Amirantes  
216 plateau, including to Desnoeuvs Island 94 km south of D'Arros. This is reflected in their  
217 higher node density of 0.84, along with a higher edge density of 0.15, revealing much greater  
218 use of the array. One tagged lemon shark was also caught by fishermen at Marie-Louise 80  
219 km south of D'Arros, while another was caught at Bird Island, 300 km away across deep  
220 water (>1,000 m). Two lemon sharks were also recorded by a receiver at Marie-Louise, but  
221 this location was one of the three receivers excluded from the present analysis due to  
222 incomplete temporal coverage. All lemon sharks recorded moving away from the islands and  
223 across the plateau ( $n = 9$ ) were  $\geq 177$  cm total length, whereas those smaller remained  
224 exclusively within the confines of the atoll and its coastal reefs.

225

226 Despite similar node and edge densities to blacktip reef sharks (0.45 and 0.04 respectively),  
227 grey reef shark movements differed significantly to blacktip reef and sicklefin lemon sharks  
228 in that no detections occurred within the atoll (Fig. 2). Instead, grey reef sharks were largely  
229 recorded along the coastal reefs (62.1% of detections), with 30.4% of detections also  
230 occurring along the drop-off. This is emphasised by the comparison of node metrics by  
231 habitat type between real and random networks, which show elevated occupancy of drop-off  
232 and coastal reef habitats in real versus random sharks (Fig. 3). Coastal reef areas involved  
233 more patrolling movements, indicated by high transit values for those receivers, whereas  
234 drop-off use was more focused and had low transit values. Grey reef movements also  
235 produced fragmented networks, with some tagged nearer the drop-off not being recorded on  
236 the coastal reefs of D'Arros and *vice versa*. One tagged grey reef shark is known to have been  
237 caught by fishermen on the reefs of D'Arros.

238

239 Although fewer individuals were tracked, the tawny nurse sharks displayed a range of  
240 movements similar to the lemon sharks (Fig. 2), reflected by similar node and edge densities  
241 (0.76 and 0.12 respectively). The majority of nurse shark detections (70.0%) occurred within  
242 the atoll, with regular movement throughout. Almost all (98.1%) of nurse shark detections  
243 within the lagoon were from individuals <200 cm ( $n = 3$ ), whereas 84.0% of all nurse shark  
244 detections outside the lagoon were from individuals >200 cm ( $n = 3$ ). These larger nurse

245 sharks frequently circumnavigated D'Arros and travelled more widely across the plateau,  
246 particularly spending time at a sandy patch several kilometres south of the islands. Chance  
247 encounters during underwater visual surveys have also revealed large aggregations (50+  
248 individuals) of adult nurse sharks of both sexes along both the eastern and western drop-offs  
249 of the Amirantes. The high use of the atoll is apparent in the comparison between real and  
250 random habitat use, where tawny nurse sharks occupied the lagoon more often than random  
251 sharks, but also the disparity for other habitats was smaller compared to other species (Fig.  
252 S2).

253  
254 Silvertip sharks showed the most restricted movements (node density 0.13, edge density  
255 0.01), producing fragmented networks that almost exclusively associate with the drop-off  
256 (96.5% of all silvertip detections were along the drop-offs (Fig. 2)). This is again reflected in  
257 the real vs. random network comparison, which showed that real silvertip sharks occupied  
258 drop-off habitats much more than random sharks, even transiting along the drop-offs more  
259 than random sharks did (Fig. S2), revealing significant patrolling behaviour. All tagged  
260 silvertip sharks were small juveniles, one of which still had a healing umbilical scar (this  
261 shark was 78 cm total length). Four of the 19 tagged silvertip sharks are known to have been  
262 caught by fishermen at their original tagging location, which is reflected by their low mean  
263 time at liberty (Table 1).

264  
265 Similar to blacktip reef sharks, hawksbill turtles also displayed movements largely restricted  
266 to the atoll, with 99.0% of all detections occurring in lagoon habitats (Fig. 2). Hawksbill  
267 movement was more focused, however, with comparatively few node (receiver) connections  
268 made (edge density was only 0.03, node density 0.46, more similar to grey reef sharks).  
269 Hawksbill turtles also displayed very high occupancy of lagoon habitats compared to random  
270 networks (Fig. 3). Individuals predominantly remained very close to where they were tagged,  
271 with very restricted dispersal between the islands and onto the plateau.

272  
273 Apart from silvertip sharks along the drop-offs, all real networks displayed lower  
274 connectivity in all habitats than random networks for all species, suggesting that all tracked  
275 individuals displayed more directed movement between nodes than their random counterparts  
276 (Fig. S2). This is also consistent with the universally low edge densities for all species, which  
277 are significantly lower than their random counterparts (Table S2). The large standard error  
278 bars on positive results in Fig. S2 reveal large variation even within habitat type, showing  
279 highly focused use of particular areas within a habitat, e.g. the eastern lagoon for blacktip reef  
280 sharks, and patches of high coral cover near the drop-off for grey reef sharks.

#### 281 *MPA Use*

282  
283  
284 Grid occupancy revealed that, overall, the proposed, larger MPA increased coverage of  
285 predator movements by 33.8%  $\pm$ 150.3 (SD), although there was considerable variation  
286 between species. Analysis revealed that 89.9% of the blacktip reef shark tracks occurred  
287 within the boundaries of the null (smaller) MPA, compared to 98.7% occurring within the  
288 proposed (larger) MPA (Fig. 4; Table S3). Lemon sharks received a similar increase in  
289 coverage from the larger MPA, with 83.5% of recorded tracks occurring within the null MPA  
290 versus 96.5% for the proposed MPA (Fig. 4; Table S3). Larger lemon sharks spent more time  
291 outside both MPAs than smaller individuals, attributable to their wider movements.

292  
293 Grey reef sharks overall received very poor coverage from both MPAs, but still received a  
294 significant increase in coverage from the larger MPA (26.6% of time in the smaller versus

295 32.8% inside the larger; Fig. 4; Table S3). Predominantly larger individuals along drop-offs  
296 receive no benefit. Smaller individuals receive high coverage from the larger MPA but very  
297 little from the smaller – attributable to their frequent movements along the northern coastal  
298 reefs (Fig. 1), which are barely covered by the smaller MPA. This drives the apparent large  
299 increase in MPA coverage for grey reef sharks evident in Fig. 4 (although the median remains  
300 low): two of the smallest grey reef sharks (79 cm and 99 cm) had their coverage more than  
301 double from ~47% to ~98%.

302

303 Nurse sharks also receive a significant increase in coverage from the small MPA to the larger  
304 MPA (from 63.7% to 82.9%; Table S3), but larger individuals still frequently travel outside  
305 across the plateau. Silvertip sharks spend very little time in either MPA (2.7% and 4.0%),  
306 with no significant difference between the two (Table S3), as movements are largely focused  
307 along the offshore drop-offs (Fig. 2). Hawksbill turtles received similar coverage from the  
308 smaller MPA (84.9%) to blacktip reef sharks, and had significantly higher coverage from the  
309 larger MPA (99.1%, Fig. 4; Table S3).

310

### 311 *MPA management*

312

313 An early form of the habitat use and MPA results presented here were communicated to the  
314 Ministry of Environment, Energy and Climate Change, Seychelles, in order to demonstrate  
315 the importance of the habitat provided by D'Arros and St Joseph, and to indicate the likely  
316 effectiveness of the larger MPA for protecting sharks. The results in part contributed to the  
317 Seychelles government formally adopting the larger MPA and declaring D'Arros and St  
318 Joseph a Special Reserve (International Union for the Conservation of Nature, IUCN,  
319 Category 1a) with a no-take zone extending 1 km from the low tide mark, effective from  
320 14/07/2014 [5]. An implementation plan was also agreed where the Save Our Seas  
321 Foundation would also provide facilities (e.g. a patrol boat) to help enforce the protection. In  
322 response to this management outcome at D'Arros and St Joseph, there has also been a  
323 proposal by the Ministry of Environment, Energy and Climate Change to extend the 400 m  
324 MPA of Aride Island on the Mahe plateau to 1 km.

325

326 **Figure S1:** Distribution of acoustic receivers ( $n = 67$ ) around D'Arros and St Joseph (a), the  
327 surrounding plateau (b) and across the Amirantes (c). Receiver locations marked with  $\odot$ .  
328 Maps created in ArcGIS, using satellite imagery from LAND INFO Worldwide Mapping and  
329 ETOPO2v2 bathymetry data.

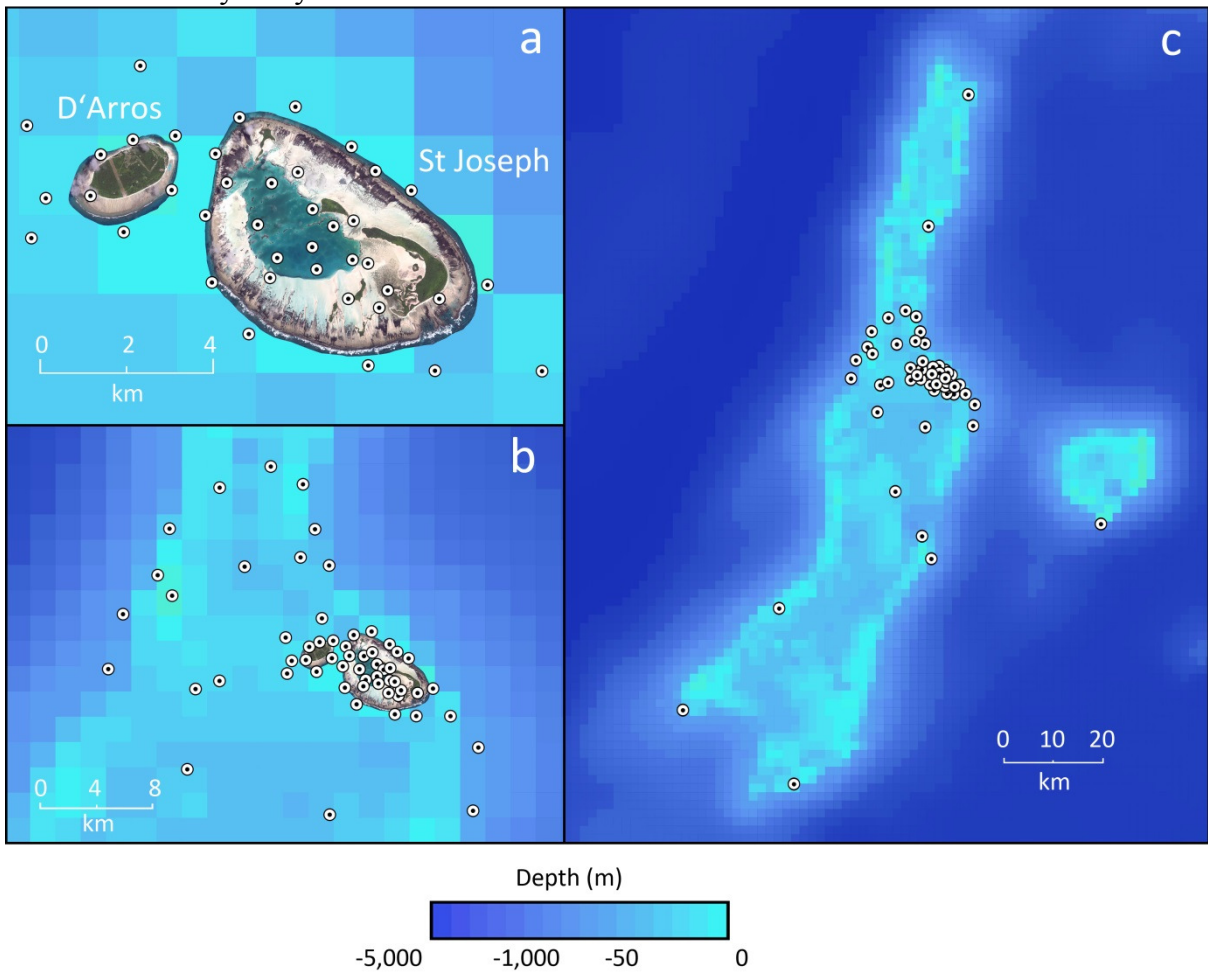

330  
331  
332



333 **Figure S2:** Charts showing, for each species, the mean percentage difference between the  
 334 actual node metric and those from the randomly generated networks (n = 100 per species),  
 335 with nodes grouped by habitat type. BT = blacktip reef, LM = lemon, GR = grey reef, TN =  
 336 tawny nurse, ST = silvertip, HB = hawksbill. Positive deviations denote where actual metric  
 337 values were higher for that habitat than random, and vice versa. Please note the different  
 338 scales on the y-axis. Error bars represent the standard error of the mean.

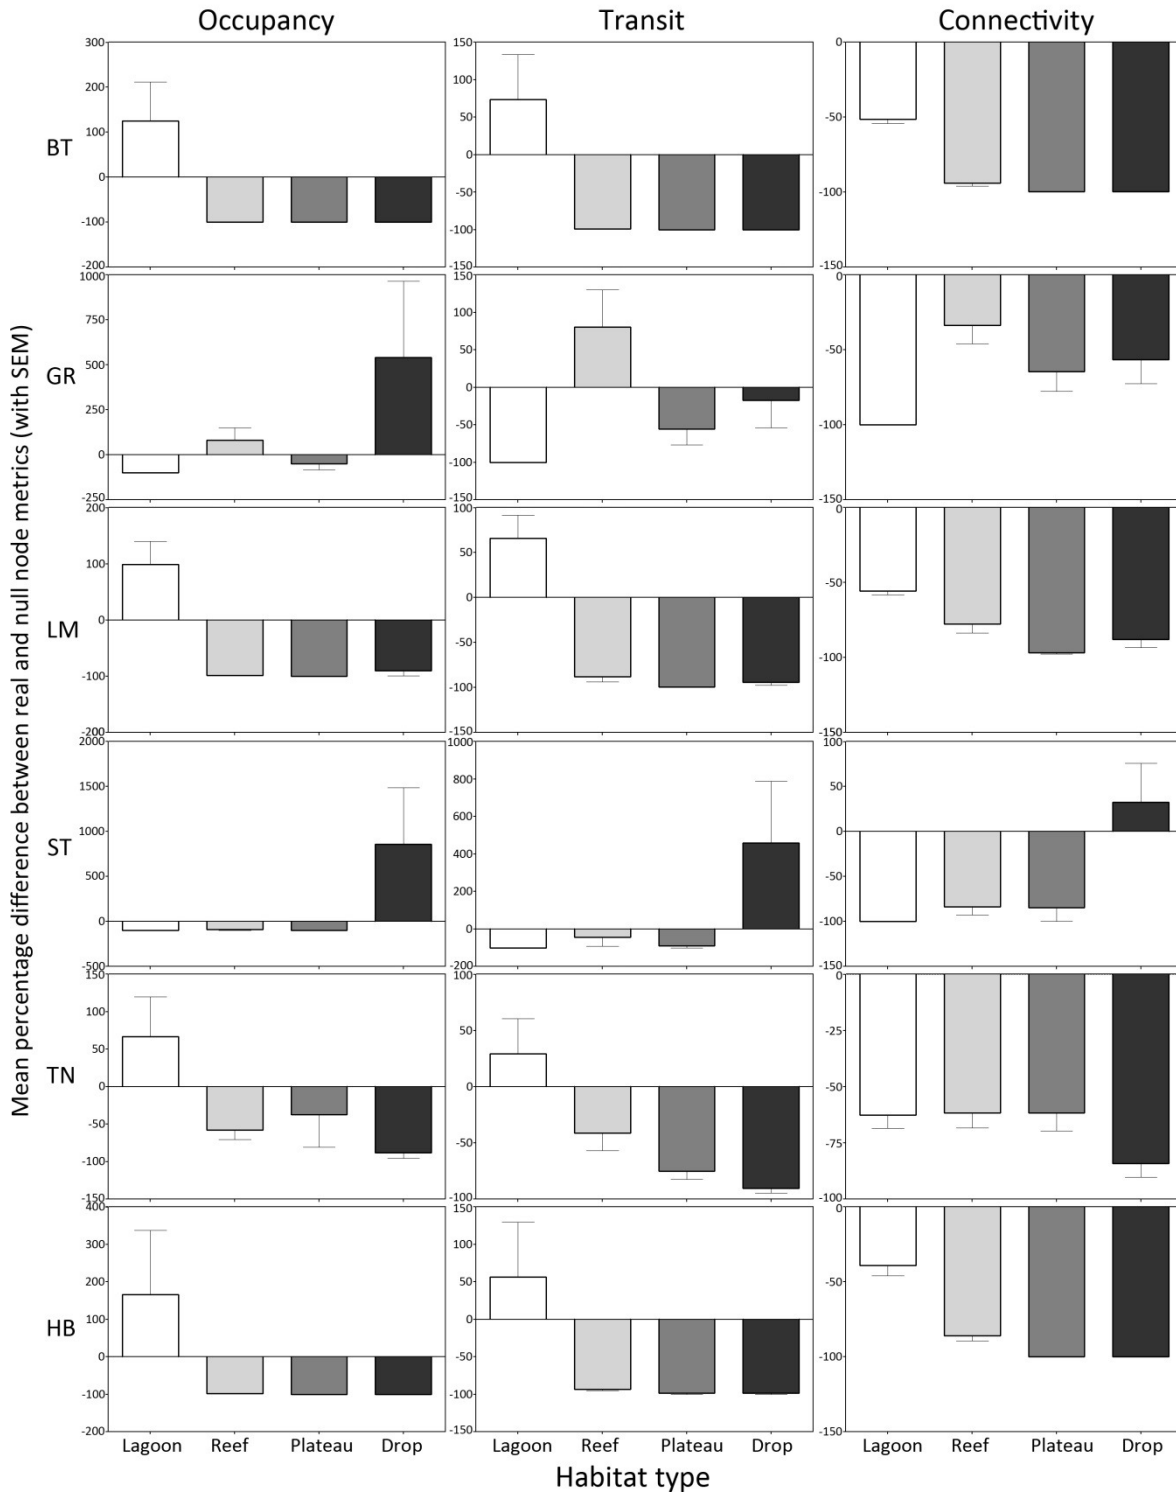

339  
 340

341 **Table S1:** Results of Wilcoxon signed rank tests comparing node metrics (strength,  
 342 betweenness, centrality) between real and randomly generated networks. BT = blacktip reef,  
 343 LM = lemon, GR = grey reef, TN = tawny nurse, ST = silvertip, HB = hawksbill.

344

| Species | Metric       | <i>n</i> | Z     | p      |
|---------|--------------|----------|-------|--------|
| BT      | Occupancy    | 67       | 4.304 | <0.001 |
| BT      | Transit      | 67       | 4.623 | <0.001 |
| BT      | Connectivity | 67       | 7.115 | <0.001 |
| GR      | Occupancy    | 67       | 2.942 | 0.003  |
| GR      | Transit      | 67       | 2.53  | 0.012  |
| GR      | Connectivity | 67       | 5.36  | <0.001 |
| LM      | Occupancy    | 67       | 3.098 | 0.002  |
| LM      | Transit      | 67       | 3.198 | 0.001  |
| LM      | Connectivity | 67       | 7.102 | <0.001 |
| ST      | Occupancy    | 67       | 5.959 | <0.001 |
| ST      | Transit      | 67       | 5.485 | <0.001 |
| ST      | Connectivity | 67       | 5.578 | <0.001 |
| TN      | Occupancy    | 67       | 2.624 | 0.009  |
| TN      | Transit      | 67       | 2.561 | 0.011  |
| TN      | Connectivity | 67       | 7.009 | <0.001 |
| HB      | Occupancy    | 67       | 5.041 | <0.001 |
| HB      | Transit      | 67       | 5.516 | <0.001 |
| HB      | Connectivity | 67       | 6.965 | <0.001 |

345

346

347 **Table S2:** Results of one-sample signed rank tests comparing the node and edge densities of  
 348 the randomly generated networks to those of the real networks. BT = blacktip reef, LM =  
 349 lemon, GR = grey reef, TN = tawny nurse, ST = silvertip, HB = hawksbill.

350

| Species | Density | Actual | Random (mean) | <i>n</i> | Z     | p      |
|---------|---------|--------|---------------|----------|-------|--------|
| BT      | Node    | 0.52   | 0.99          | 100      | 8.843 | <0.001 |
| BT      | Edge    | 0.09   | 0.72          | 100      | 8.682 | <0.001 |
| GR      | Node    | 0.45   | 0.98          | 100      | 8.762 | <0.001 |
| GR      | Edge    | 0.04   | 0.54          | 100      | 8.682 | <0.001 |
| LM      | Node    | 0.84   | 0.99          | 100      | 8.836 | <0.001 |
| LM      | Edge    | 0.15   | 0.72          | 100      | 8.683 | <0.001 |
| ST      | Node    | 0.13   | 0.93          | 100      | 8.727 | <0.001 |
| ST      | Edge    | 0.01   | 0.21          | 100      | 8.683 | <0.001 |
| TN      | Node    | 0.76   | 0.97          | 100      | 8.762 | <0.001 |
| TN      | Edge    | 0.12   | 0.52          | 100      | 8.683 | <0.001 |
| HB      | Node    | 0.46   | 0.98          | 100      | 8.772 | <0.001 |
| HB      | Edge    | 0.03   | 0.59          | 100      | 8.682 | <0.001 |

351

352

353

354 **Table S3:** Results of Wilcoxon matched-pairs signed rank tests comparing the time spent  
355 inside the two different MPAs, with Monte Carlo p values calculated after 10,000  
356 permutations.  
357

| Species   | <i>n</i> | Z     | p      |
|-----------|----------|-------|--------|
| Blacktip  | 25       | 4.015 | <0.001 |
| Grey      | 22       | 2.521 | 0.006  |
| Lemon     | 20       | 3.621 | <0.001 |
| Nurse     | 6        | 2.201 | 0.019  |
| Silvertip | 13       | 1.826 | 0.073  |
| Hawksbill | 24       | 2.805 | 0.001  |

358

359

## 360 **References**

361

362

363 1. Von Brandis, R. 2011 The foraging ecology of hawksbill turtles at D'Arros Island,  
364 Republic of Seychelles. (Doctoral Thesis, Department of Nature Conservation, Faculty of  
365 Natural Science, Tshwane).

366 2. Limpus, C. J., Couper, P. J. & Read, M. A. 1994 The green turtle, *Chelonia mydas*, in  
367 Queensland: a preliminary description of the population structure in a coral reef feeding  
368 ground. *Memoirs Qld. Mus. Nat.* **12**, 195–205.

369 3. Jacoby, D. M. P., Brooks, E. J., Croft, D. P. & Sims, D. W. 2012 Developing a deeper  
370 understanding of animal movements and spatial dynamics through novel application of  
371 network analyses. *Methods Ecol. Evol.* **3**, 574–583. (doi:10.1111/j.2041-210X.2012.00187.x)

372 4. 1991 National Parks and Nature Conservancy Act. (*Ministry of Environment, Energy  
373 and Climate Change, Victoria, Seychelles*).

374 5. Payet, R. 2014 National Parks (D'Arros and St Joseph Special Reserve) Designation  
375 Order. (*Ministry of Environment, Energy and Climate Change, Victoria, Seychelles*).

376

377
